# Supplementary material for: Quality Assessment of Red Wine Grapes through NIR Spectroscopy
Source: MDPI journal article supplement (doi:10.3390/agronomy12030637), 2022-03-04
Supplement: s1 [file s1]

Archive with 1 entries (1 files):
- agronomy-1573380 - supplementary revised.pdf
