# Supplementary material for: Quality Assessment of Red Wine Grapes through NIR Spectroscopy
Source: MDPI journal article supplement (doi:10.3390/agronomy12030637), 2022-03-04
Supplement: s1 [file s1 › agronomy-1573380 - supplementary revised.pdf]

Supplementary files

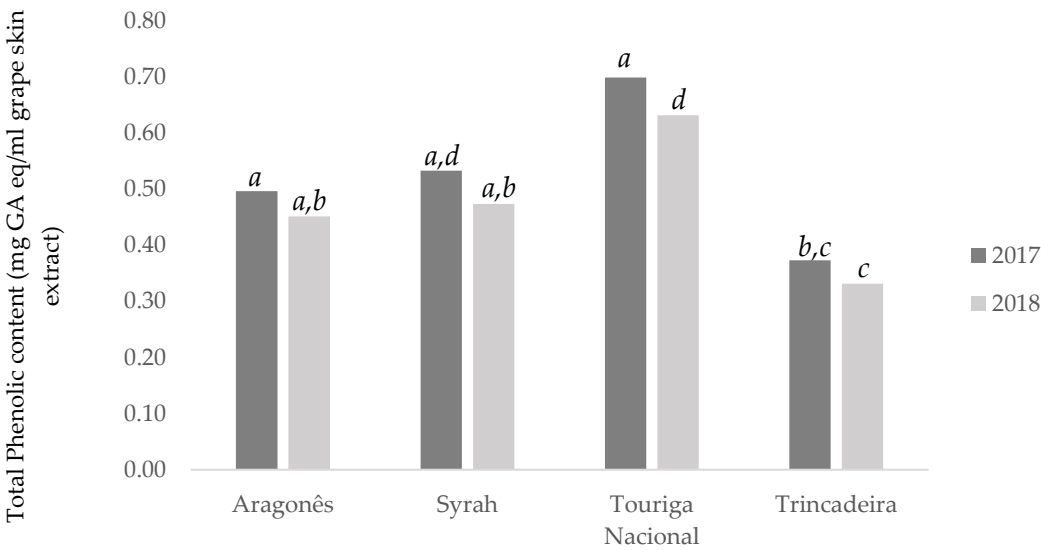

Figure S1. Post-Hoc Tukey HSD test from a factorial ANOVA for the Total Phenolic content (mg GA eq/ml grape skin extract) among grape varieties in 2017 and 2018 years. Bars that do not share a letter are significantly different with a  $p < 0.05$ .

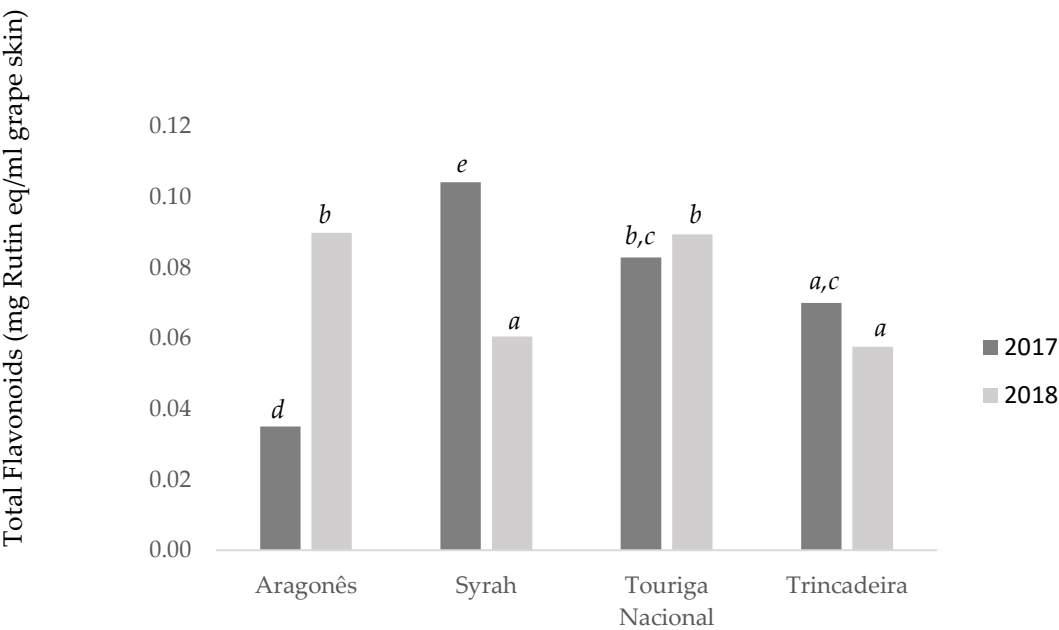

Figure S2. Post-Hoc Tukey HSD test from a factorial ANOVA for Total Flavonoids (mg Rutin eq/ml grape skin) among grape varieties in 2017 and 2018 years. Bars that do not share a letter are significantly different with a  $p < 0.05$ .

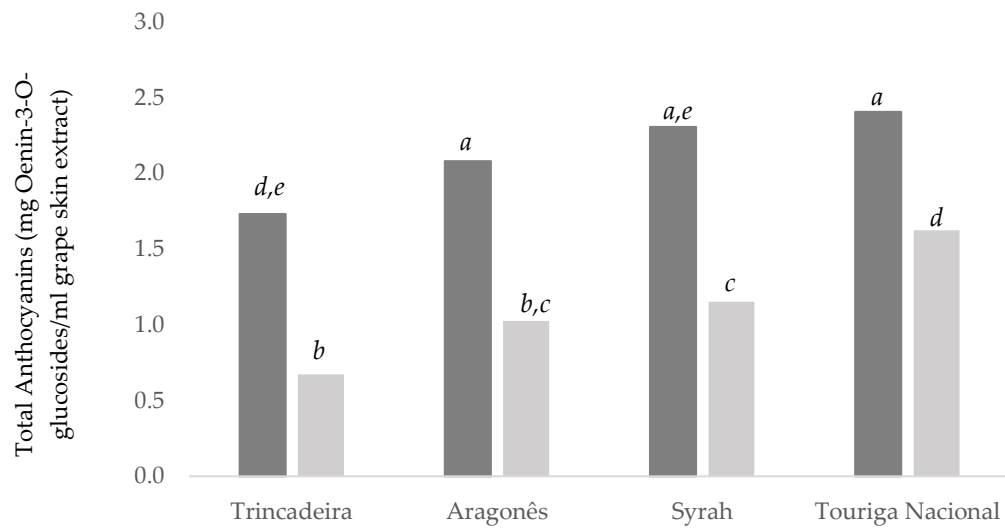

Figure S3. Post-Hoc Tukey HSD test from a factorial ANOVA for the Total Anthocyanins (mg Oenin-3-O-glucosides/ml grape skin extract) among grape varieties in 2017 and 2018 years. Bars that do not share a letter are significantly different with a  $p < 0.05$ .

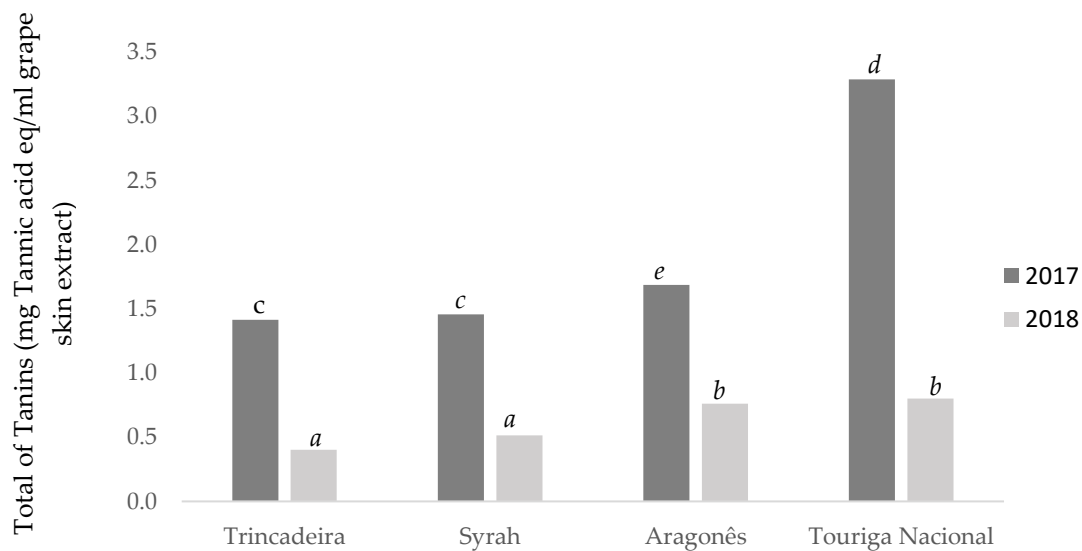

Figure S4. Post-Hoc Tukey HSD test from a factorial ANOVA for Total of Tanins (mg Tannic acid eq/ml grape skin extract) among grape varieties in 2017 and 2018 years. Bars that do not share a letter are significantly different with a  $p < 0.05$ .

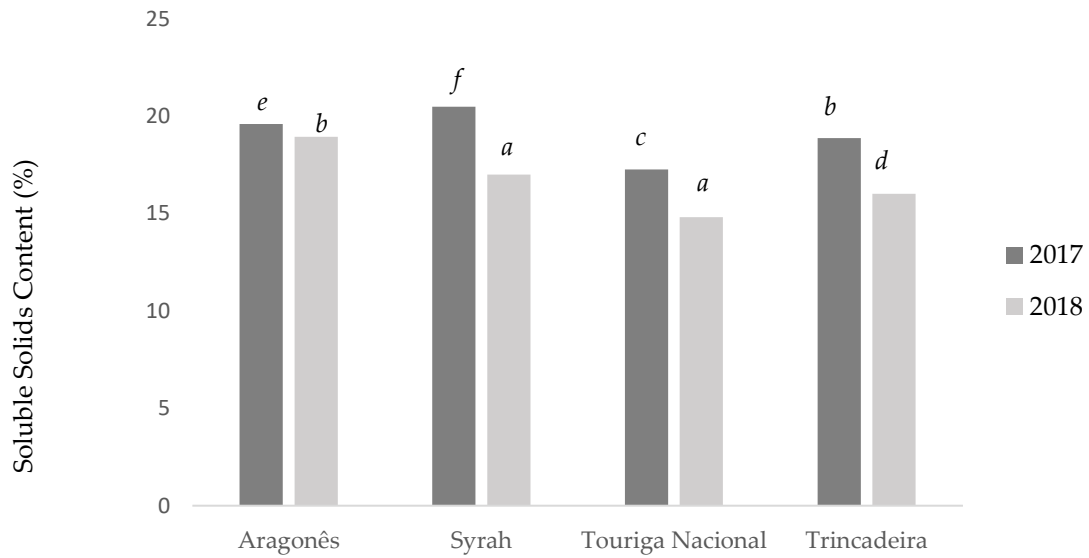

Figure S5. Post-Hoc Tukey HSD test from a factorial ANOVA for Soluble Solids Content (%) among grape varieties in 2017 and 2018 years. Bars that do not share a letter are significantly different with a  $p < 0.05$ .

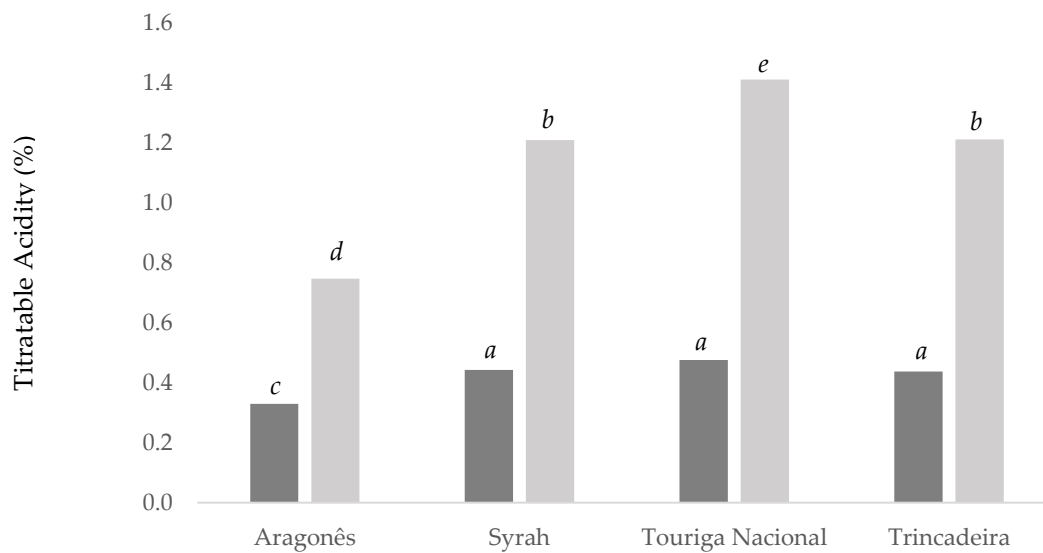

Figure S6. Post-Hoc Tukey HSD test from a factorial ANOVA for Titratable Acidity (%) among grape varieties in 2017 and 2018 years. Bars that do not share a letter are significantly different with a  $p < 0.05$ .
